# Supplementary material for: The Impact of Warming on Assembly Processes and Diversity Patterns of Bacterial Communities in Mesocosms
Source: MDPI journal article supplement (doi:10.3390/microorganisms11112807), 2023-11-19
Supplement: s1 [file s1]

Table S1. Physicochemical properties of water during experiment.

| Season | Treatment | pH        | DO<br>(mg/L) | Temperature<br>(°C) | Conductivity<br>(μS/cm) | Chl-a<br>(μg/L) | TN<br>(mg/L) | NH <sub>4</sub> <sup>+</sup> -N<br>(mg/L) | NO <sub>3</sub> <sup>-</sup> -N<br>(mg/L) | TP<br>(mg/L) | PO <sub>4</sub> <sup>3-</sup> -P<br>(μg/L) |
|--------|-----------|-----------|--------------|---------------------|-------------------------|-----------------|--------------|-------------------------------------------|-------------------------------------------|--------------|--------------------------------------------|
| Spring | C         | 9.89±0.27 | 8.56±1.18    | 20.14               | 191.13±5.43             | 2.43±1.53       | 0.51±0.23    | 0.05±0.00                                 | 0.04±0.02                                 | 0.04±0.01    | 13.22±4.29                                 |
|        | T         | 9.29±0.38 | 7.75±0.47    | 24.19               | 225.09±8.29             | 5.81±4.70       | 0.59±0.19    | 0.14±0.06                                 | 0.02±0.01                                 | 0.06±0.03    | 16.16±0.55                                 |
|        | H         | 9.15±0.24 | 7.39±0.66    | 24.27               | 222.57±10.40            | 3.69±1.35       | 0.55±0.01    | 0.09±0.01                                 | 0.01±0.00                                 | 0.03±0.01    | 14.51±4.87                                 |
| Summer | C         | 7.67±0.67 | 1.99±2.37    | 29.59               | 217.50±26.78            | 9.30±5.62       | 0.85±0.27    | 0.15±0.02                                 | 0.07±0.02                                 | 0.09±0.02    | 18.47±9.06                                 |
|        | T         | 8.35±0.97 | 3.53±3.61    | 33.71               | 275.40±42.04            | 31.55±10.03     | 1.24±0.51    | 0.17±0.05                                 | 0.15±0.04                                 | 0.12±0.05    | 31.95±25.94                                |
|        | H         | 7.70±0.27 | 1.91±1.96    | 33.99               | 306.64±5.09             | 42.82±10.30     | 1.27±0.33    | 0.25±0.07                                 | 0.12±0.01                                 | 0.16±0.10    | 24.81±24.06                                |
| Autumn | C         | 7.63±0.26 | 4.52±1.73    | 20.86               | 264.81±31.63            | 11.03±4.93      | 0.58±0.14    | 0.14±0.03                                 | 0.14±0.07                                 | 0.12±0.03    | 24.27±12.46                                |
|        | T         | 8.17±0.47 | 7.64±0.71    | 24.81               | 307.08±46.55            | 33.61±16.43     | 1.33±0.40    | 0.23±0.07                                 | 0.18±0.01                                 | 0.14±0.03    | 16.73±7.59                                 |
|        | H         | 7.88±0.28 | 4.45±2.43    | 24.63               | 324.27±39.70            | 23.44±9.05      | 1.02±0.12    | 0.21±0.07                                 | 0.13±0.05                                 | 0.15±0.07    | 22.76±10.70                                |
| Winter | C         | 9.40±0.13 | 13.49±0.30   | 7.18                | 209.90±3.40             | 1.29±0.23       | 0.70±0.08    | 0.03±0.01                                 | 0.39±0.08                                 | 0.01±0.002   | --                                         |
|        | T         | 9.71±0.19 | 12.67±0.89   | 11.13               | 203.80±3.46             | 2.89±1.68       | 0.60±0.06    | 0.02±0.01                                 | 0.22±0.05                                 | 0.02±0.01    | --                                         |
|        | H         | 9.48±0.16 | 13.02±0.83   | 10.77               | 207.30±3.58             | 1.72±0.18       | 0.67±0.16    | 0.06±0.04                                 | 0.28±0.05                                 | 0.02±0.002   | --                                         |

Note: --, not detected.

Table S2. Physicochemical properties of sediments for this study.

| Season | Treatment | IP<br>(mg/kg) | TP<br>(g/kg) | TN<br>(g/kg) | NH <sub>4</sub> <sup>+</sup> -N<br>(mg/kg) | NO <sub>3</sub> <sup>-</sup> -N<br>(mg/kg) | NO <sub>2</sub> <sup>-</sup> -N<br>(mg/kg) |
|--------|-----------|---------------|--------------|--------------|--------------------------------------------|--------------------------------------------|--------------------------------------------|
| Spring | C         | 0.91±0.21     | 1.05±0.25    | 3.19±0.26    | 72.12±6.39                                 | 2479.47±328.90                             | 102.41±20.36                               |
|        | T         | 0.92±0.30     | 1.22±0.35    | 3.45±0.36    | 66.99±22.52                                | 2663.68±456.05                             | 98.50±25.16                                |
|        | H         | 0.85±0.07     | 0.76±0.27    | 3.72±0.06    | 71.46±6.62                                 | 2837.82±334.87                             | 110.88±20.29                               |
| Summer | C         | 0.84±0.20     | 1.06±0.16    | 3.21±0.18    | 73.55±76.98                                | 1761.95±98.53                              | 134.89±13.66                               |
|        | T         | 1.01±0.14     | 0.95±0.17    | 3.83±0.07    | 125.98±52.98                               | 259.81±152.01                              | 119.64±7.74                                |
|        | H         | 0.78±0.18     | 0.96±0.13    | 3.47±0.19    | 141.59±55.67                               | 347.77±232.74                              | 86.69±37.45                                |
| Autumn | C         | 0.83±0.59     | 0.58±0.29    | 3.58±0.74    | 50.46±58.08                                | 105.10±44.30                               | 125.23±42.43                               |
|        | T         | 1.01±0.62     | 0.76±0.36    | 3.93±0.14    | 110.09±50.54                               | 52.39±42.11                                | 102.26±16.45                               |
|        | H         | 0.69±0.37     | 0.75±0.24    | 3.69±0.22    | 169.24±27.89                               | 425.62±109.80                              | 111.62±43.19                               |
| Winter | C         | 1.18±0.19     | 0.90±0.37    | 3.70±0.52    | 26.94±12.56                                | 529.46±295.32                              | 102.67±12.81                               |
|        | T         | 1.49±0.04     | 1.01±0.23    | 3.66±0.25    | 70.22±58.77                                | 869.75±278.94                              | 138.28±53.60                               |
|        | H         | 1.22±0.10     | 1.08±0.22    | 3.57±0.24    | 53.18±23.75                                | 1239.36±196.92                             | 97.89±6.78                                 |

Table S3. Results of PERMANOVA tests (Euclidean dissimilarity) testing the effects of warming and treatment on physicochemical properties in water throughout the experiment.

|                 | Temperature | pH       | Conductivity | Chl-a    | DO       | TN       | NH <sub>4</sub> <sup>+</sup> -N | NO <sub>3</sub> <sup>-</sup> -N | TP       | PO <sub>4</sub> <sup>3-</sup> -P |
|-----------------|-------------|----------|--------------|----------|----------|----------|---------------------------------|---------------------------------|----------|----------------------------------|
| Warming         | 0.03*       | 0.129    | 0.001***     | 0.001*** | 0.252    | 0.007**  | 0.008**                         | 0.721                           | 0.075    | 0.826                            |
| Season          | 0.001***    | 0.001*** | 0.001***     | 0.001*** | 0.001*** | 0.001*** | 0.001**                         | 0.002**                         | 0.001*** | 0.313                            |
| Warming: Season | 0.994       | 0.45     | 0.003**      | 0.016*   | 0.194    | 0.002**  | 0.116                           | 0.056                           | 0.514    | 0.897                            |

\*  $p < 0.05$ , \*\*  $p < 0.01$ , \*\*\*  $p < 0.001$

Table S4. Results of PERMANOVA tests (Euclidean dissimilarity) testing the effects of warming and treatment on physicochemical properties in sediments over the study duration.

|                 | IP       | NH <sub>4</sub> <sup>+</sup> -N | NO <sub>2</sub> <sup>-</sup> -N | NO <sub>3</sub> <sup>-</sup> -N | TN      | TP      |
|-----------------|----------|---------------------------------|---------------------------------|---------------------------------|---------|---------|
| Warming         | 0.052    | 0.002**                         | 0.147                           | 0.001***                        | 0.004** | 0.75    |
| Season          | 0.001*** | 0.002**                         | 0.842                           | 0.001***                        | 0.092   | 0.002** |
| Warming: Season | 0.965    | 0.087                           | 0.061                           | 0.001***                        | 0.108   | 0.153   |

\*  $p < 0.05$ , \*\*  $p < 0.01$ , \*\*\*  $p < 0.001$

Table S5. Results of PERMANOVA tests (Euclidean dissimilarity) testing the effects of warming and treatment on the top-10 phylum taxa of the bacteria communities in water.

|                  | Treatment | Season   | Treatment: Season |
|------------------|-----------|----------|-------------------|
| Proteobacteria   | 0.499     | 0.005**  | 0.177             |
| Bacteroidetes    | 0.559     | 0.003**  | 0.397             |
| Actinobacteria   | 0.121     | 0.001*** | 0.227             |
| Cyanobacteria    | 0.115     | 0.243    | 0.574             |
| Verrucomicrobia  | 0.723     | 0.103    | 0.590             |
| Chlorobi         | 0.540     | 0.001*** | 0.187             |
| Chloroflexi      | 0.254     | 0.001*** | 0.472             |
| Firmicutes       | 0.395     | 0.001*** | 0.822             |
| Gemmatimonadetes | 0.380     | 0.001*** | 0.021*            |
| Acidobacteria    | 0.381     | 0.002**  | 0.299             |
| Others           | 0.958     | 0.003**  | 0.999             |

\*  $p < 0.05$ , \*\*  $p < 0.01$ , \*\*\*  $p < 0.001$

Table S6. Results of PERMANOVA tests (Euclidean dissimilarity) testing the effects of warming and treatment on the top-10 phylum taxa of the bacteria communities in sediments.

|                 | Treatment | Season   | Treatment: Season |
|-----------------|-----------|----------|-------------------|
| Proteobacteria  | 0.387     | 0.094    | 0.323             |
| Chloroflexi     | 0.009**   | 0.001*** | 0.006**           |
| Nitrospirae     | 0.013*    | 0.001*** | 0.309             |
| Acidobacteria   | 0.557     | 0.001*** | 0.383             |
| Bacteroidetes   | 0.002**   | 0.001*** | 0.009**           |
| Ignavibacteriae | 0.225     | 0.001*** | 0.08              |
| Aminicenantes   | 0.063     | 0.007**  | 0.338             |
| Firmicutes      | 0.001***  | 0.001*** | 0.001***          |
| Actinobacteria  | 0.003**   | 0.001*** | 0.009**           |
| Latescibacteria | 0.068     | 0.517    | 0.809             |
| Others          | 0.809     | 0.001*** | 0.329             |

\*  $p < 0.05$ , \*\*  $p < 0.01$ , \*\*\*  $p < 0.001$

Table S7. Results of Kruskal-Wallis test testing the effects of different temperature treatments on the top-10 phylum taxa of the bacteria communities in water.

|                  | Total |       |       | Spring |        |       | Summer |       |       | Autumn |         |         | Winter |         |       |
|------------------|-------|-------|-------|--------|--------|-------|--------|-------|-------|--------|---------|---------|--------|---------|-------|
|                  | C-T   | C-H   | T-H   | C-T    | C-H    | T-H   | C-T    | C-H   | T-H   | C-T    | C-H     | T-H     | C-T    | C-H     | T-H   |
| Proteobacteria   | 0.212 | 0.869 | 0.266 | 0.873  | 0.262  | 0.262 | 0.631  | 0.262 | 0.522 | 0.037* | 0.631   | 0.037*  | 0.936  | 0.109   | 0.150 |
| Bacteroidetes    | 0.885 | 0.635 | 0.523 | 0.631  | 0.337  | 0.522 | 0.749  | 0.522 | 0.749 | 0.423  | 0.150   | 0.423   | 0.337  | 0.055   | 0.200 |
| Actinobacteria   | 0.132 | 0.503 | 0.303 | 0.749  | 0.423  | 0.200 | 0.025* | 0.873 | 0.150 | 0.200  | 0.004** | 0.423   | 0.631  | 0.631   | 0.423 |
| Cyanobacteria    | 0.201 | 0.665 | 0.398 | 0.423  | 0.873  | 0.522 | 0.337  | 0.423 | 0.873 | 0.055  | 0.200   | 0.006** | 0.262  | 0.262   | 0.873 |
| Verrucomicrobia  | 0.244 | 0.951 | 0.409 | 0.873  | 0.200  | 0.200 | 0.109  | 0.631 | 0.337 | 0.749  | 0.150   | 0.055   | 1.000  | 0.749   | 0.873 |
| Chlorobi         | 0.152 | 0.726 | 0.327 | 0.016* | 0.150  | 0.631 | 0.749  | 0.522 | 0.200 | 0.055  | 0.873   | 0.016*  | 0.749  | 0.004** | 0.064 |
| Chloroflexi      | 0.523 | 0.959 | 0.695 | 0.262  | 0.262  | 1.000 | 0.337  | 0.200 | 0.873 | 0.109  | 0.200   | 0.337   | 0.334  | 0.128   | 0.810 |
| Firmicutes       | 0.749 | 0.951 | 0.703 | 0.258  | 0.024* | 0.337 | 0.749  | 0.873 | 0.749 | 1.000  | 0.749   | 0.749   | 0.522  | 0.025*  | 0.173 |
| Gemmatimonadetes | 0.557 | 0.557 | 0.773 | 0.016* | 0.055  | 0.873 | 0.077  | 0.688 | 0.197 | 0.936  | 0.936   | 0.520   | 0.872  | 0.172   | 0.378 |
| Acidobacteria    | 0.19  | 0.312 | 0.741 | 0.199  | 0.423  | 0.936 | 0.025* | 0.337 | 0.150 | 0.336  | 0.261   | 0.873   | 0.521  | 0.873   | 0.335 |
| Others           | 0.741 | 0.918 | 0.703 | 0.631  | 0.337  | 0.749 | 0.749  | 0.749 | 0.873 | 0.522  | 0.631   | 0.873   | 0.522  | 0.749   | 0.423 |

\*  $p < 0.05$ , \*\*  $p < 0.01$ , \*\*\*  $p < 0.001$

Table S8. Results of Kruskal-Wallis test testing the effects of different temperature treatments on the top-10 phylum taxa of the bacteria communities in sediment.

|                 | Total |        |       | Spring |        |         | Summer |       |       | Autumn |        |       | Winter |         |        |
|-----------------|-------|--------|-------|--------|--------|---------|--------|-------|-------|--------|--------|-------|--------|---------|--------|
|                 | C-T   | C-H    | T-H   | C-T    | C-H    | T-H     | C-T    | C-H   | T-H   | C-T    | C-H    | T-H   | C-T    | C-H     | T-H    |
| Proteobacteria  | 0.509 | 0.264  | 0.546 | 0.873  | 0.078  | 0.200   | 0.423  | 0.378 | 0.873 | 0.873  | 0.715  | 0.273 | 0.273  | 0.055   | 0.273  |
| Chloroflexi     | 0.670 | 0.037* | 0.070 | 0.262  | 0.631  | 0.337   | 0.522  | 0.522 | 0.749 | 0.873  | 1.000  | 0.855 | 0.201  | 0.006** | 0.018* |
| Nitrospirae     | 0.077 | 0.120  | 0.560 | 0.200  | 0.423  | 0.016*  | 0.522  | 0.262 | 0.749 | 0.262  | 0.018* | 0.100 | 0.201  | 0.200   | 0.855  |
| Acidobacteria   | 0.360 | 0.898  | 0.448 | 0.109  | 0.200  | 0.522   | 1.000  | 0.423 | 0.262 | 1.000  | 1.000  | 0.584 | 0.584  | 0.262   | 0.855  |
| Bacteroidetes   | 0.610 | 0.061  | 0.263 | 0.749  | 0.262  | 0.423   | 0.150  | 0.262 | 0.575 | 1.000  | 0.068  | 0.100 | 0.465  | 0.025*  | 0.045* |
| Ignavibacteriae | 0.865 | 0.242  | 0.199 | 0.873  | 0.055  | 0.037*  | 0.873  | 0.423 | 0.337 | 0.873  | 0.855  | 0.584 | 0.855  | 0.055   | 0.144  |
| Aminicenantetes | 0.750 | 0.030* | 0.109 | 0.150  | 1.000  | 0.173   | 0.262  | 0.423 | 1.000 | 0.631  | 0.584  | 0.855 | 0.715  | 0.045*  | 0.100  |
| Firmicutes      | 0.395 | 0.573  | 0.144 | 0.055  | 0.423  | 0.025*  | 1.000  | 0.688 | 0.749 | 0.200  | 0.855  | 0.201 | 0.855  | 0.078   | 0.018* |
| Actinobacteria  | 0.194 | 0.307  | 0.051 | 0.037* | 0.016* | 0.004** | 0.936  | 0.423 | 0.873 | 0.688  | 0.201  | 1.000 | 0.201  | 0.748   | 0.169  |
| Latescibacteria | 0.873 | 0.023* | 0.060 | 0.109  | 0.688  | 0.109   | 0.470  | 0.262 | 0.631 | 0.522  | 0.361  | 0.465 | 0.465  | 0.150   | 0.361  |
| Others          | 0.407 | 0.033* | 0.339 | 0.873  | 0.262  | 0.873   | 0.522  | 0.521 | 0.748 | 0.749  | 0.273  | 0.100 | 0.100  | 0.037*  | 1.000  |

\*  $p < 0.05$ , \*\*  $p < 0.01$ , \*\*\*  $p < 0.001$



Table S9. Dissimilarity tests of microbial communities for water and sediments. The values of upper rows for MRPP, ANOSIM, and PERMANOVA are delta, R value, and F-value, respectively. The values of lower rows are the significance value (*P-value*).

| Water-Sediment | MRPP   | ANOSIM | PERMANOVA |
|----------------|--------|--------|-----------|
| Bray-Curtis    | 0.8126 | 0.9752 | 80.5479   |
|                | 0.0010 | 0.0010 | 0.0010    |
| Jaccard        | 0.8730 | 0.9752 | 47.4635   |
|                | 0.0010 | 0.0010 | 0.0010    |

Table S10. Permutational multivariate analysis of variance (PERMANOVA) based on incidence-based Bray-Curtis's dissimilarity in bacterioplankton and sedimentary bacteria community composition in experimental mesocosms characterized by different warming and seasons.

| Habitat  |                 | d.f. | R <sup>2</sup> | F model | <i>p</i> |
|----------|-----------------|------|----------------|---------|----------|
| Water    | Warming         | 2    | 0.036          | 1.710   | 0.003**  |
|          | Season          | 3    | 0.244          | 7.786   | 0.001*** |
|          | Warming: Season | 6    | 0.094          | 1.500   | 0.002**  |
|          | Residuals       | 60   | 0.626          |         |          |
| Sediment | Warming         | 2    | 0.028          | 0.983   | 0.467    |
|          | Season          | 3    | 0.043          | 0.996   | 0.434    |
|          | Warming: Season | 6    | 0.089          | 1.035   | 0.378    |
|          | Residuals       | 59   | 0.841          |         |          |

\*  $p < 0.05$ , \*\*  $p < 0.01$ , \*\*\*  $p < 0.001$

Significance tests were performed using F-tests based on sequential sums of squares from permutations of the raw data.

Table S11. Alpha diversity of bacteria in water and sediment.

| Season | Scenario | Water      |                 | Sediment   |                  |
|--------|----------|------------|-----------------|------------|------------------|
|        |          | Shannon    | Chao1           | Shannon    | Chao1            |
| Spring | C        | 5.71 ±0.18 | 620.24 ±62.54   | 9.17 ±0.23 | 5029.65 ±296.04  |
|        | T        | 5.80 ±0.45 | 645.93 ±161.82  | 8.82 ±0.31 | 3969.77 ±939.44  |
|        | H        | 5.72 ±0.37 | 686.06 ±175.62  | 9.26 ±0.28 | 5259.29 ±539.14  |
| Summer | C        | 5.79 ±0.89 | 1124.86 ±320.06 | 9.20 ±0.31 | 5079.52 ±809.88  |
|        | T        | 4.93 ±1.44 | 940.69 ±383.35  | 9.25 ±0.30 | 5097.21 ±457.13  |
|        | H        | 5.18 ±0.88 | 1124.36 ±198.57 | 9.35 ±0.11 | 5221.79 ±180.54  |
| Autumn | C        | 5.90 ±0.57 | 1261.08 ±233.55 | 9.59 ±0.20 | 5797.61 ±85.67   |
|        | T        | 5.72 ±0.88 | 1378.92 ±243.45 | 9.51 ±0.31 | 5510.96 ±403.77  |
|        | H        | 6.21 ±0.85 | 1370.31 ±210.53 | 9.58 ±0.30 | 5597.36 ±339.00  |
| Winter | C        | 5.53 ±0.49 | 904.55 ±178.19  | 9.19 ±0.49 | 4085.34 ±1115.94 |
|        | T        | 4.92 ±0.83 | 719.45 ±200.08  | 9.78 ±0.40 | 5549.74 ±1223.17 |
|        | H        | 5.26 ±0.39 | 783.60 ±134.71  | 9.80 ±0.24 | 5778.45 ±415.63  |

Table S12. Results of Wilcoxon tests on the effects of different scenarios on alpha-diversity.

|        |     | Water                   |                           | Sediment                |                           |
|--------|-----|-------------------------|---------------------------|-------------------------|---------------------------|
|        |     | Chao1<br><i>p-value</i> | Shannon<br><i>p-value</i> | Chao1<br><i>p-value</i> | Shannon<br><i>p-value</i> |
| total  | C-H | 1                       | 0.791                     | 0.106                   | 0.438                     |
| total  | C-T | 1                       | 1                         | 1                       | 1                         |
| total  | H-T | 1                       | 1                         | 0.828                   | 0.695                     |
| spring | C-H | 0.699                   | 0.937                     | 0.041*                  | 0.093                     |
| spring | C-T | 0.589                   | 0.589                     | 0.24                    | 0.31                      |
| spring | H-T | 0.394                   | 1                         | 0.065                   | 0.065                     |
| summer | C-H | 0.937                   | 0.31                      | 0.589                   | 0.937                     |
| summer | C-T | 0.699                   | 0.937                     | 0.818                   | 0.394                     |
| summer | H-T | 0.589                   | 0.485                     | 0.937                   | 0.699                     |
| autumn | C-H | 0.937                   | 0.394                     | 0.931                   | 0.792                     |
| autumn | C-T | 0.589                   | 0.485                     | 0.937                   | 1                         |
| autumn | H-T | 0.699                   | 0.937                     | 0.662                   | 1                         |
| winter | C-H | 0.589                   | 0.394                     | 0.015*                  | 0.041*                    |
| winter | C-T | 0.589                   | 0.18                      | 0.065                   | 0.093                     |
| winter | H-T | 0.818                   | 0.589                     | 1                       | 1                         |

Table S13. Results of Wilcoxon tests on the effects of different seasons on alpha-diversity.

|       |        |        | Water                   |                           | Sediment                |                           |
|-------|--------|--------|-------------------------|---------------------------|-------------------------|---------------------------|
|       |        |        | Chao1<br><i>p-value</i> | Shannon<br><i>p-value</i> | Chao1<br><i>p-value</i> | Shannon<br><i>p-value</i> |
| total | spring | summer | 0.001***                | 0.089                     | 0.256                   | 0.205                     |
| total | spring | autumn | 0.001***                | 0.509                     | 0.003**                 | 0.0003***                 |
| total | spring | winter | 0.001***                | 0.008*                    | 0.221                   | 0.001**                   |
| total | summer | autumn | 0.003**                 | 0.089                     | 0.005**                 | 0.005**                   |
| total | summer | winter | 0.024*                  | 0.743                     | 0.335                   | 0.007**                   |
| total | autumn | winter | 0.001***                | 0.024*                    | 0.782                   | 0.613                     |
| C     | spring | summer | 0.39                    | 0.589                     | 0.240                   | 1                         |
| C     | spring | autumn | 0.009**                 | 0.818                     | 0.041*                  | 0.180                     |
| C     | summer | autumn | 0.002**                 | 0.818                     | 0.065                   | 0.065                     |
| C     | winter | spring | 0.699                   | 0.937                     | 0.132                   | 0.818                     |
| C     | winter | summer | 0.041*                  | 0.310                     | 0.699                   | 0.937                     |
| C     | winter | autumn | 0.002**                 | 0.310                     | 0.009**                 | 0.009**                   |
| T     | spring | summer | 0.240                   | 0.310                     | 0.065                   | 0.065                     |
| T     | spring | autumn | 0.002**                 | 0.937                     | 0.009**                 | 0.009**                   |
| T     | summer | autumn | 0.015*                  | 0.394                     | 0.180                   | 0.310                     |
| T     | winter | spring | 0.485                   | 0.041*                    | 0.026*                  | 0.004**                   |
| T     | winter | summer | 0.180                   | 0.937                     | 0.394                   | 0.026*                    |
| T     | winter | autumn | 0.002**                 | 0.132                     | 0.937                   | 0.394                     |
| H     | spring | summer | 0.002**                 | 0.093                     | 0.177                   | 0.177                     |
| H     | spring | autumn | 0.002**                 | 0.699                     | 0.002**                 | 0.004**                   |
| H     | summer | autumn | 0.065                   | 0.065                     | 0.082                   | 0.247                     |
| H     | winter | spring | 0.093                   | 0.065                     | 0.093                   | 0.009**                   |
| H     | winter | summer | 0.026*                  | 0.589                     | 0.537                   | 0.126                     |
| H     | winter | autumn | 0.002**                 | 0.180                     | 0.589                   | 0.699                     |

Table S14. Relationships between within-community NTI and environmental factors in the water and sediment (based on general linear model).

|                                  | Water       |                |                                 | Sediment    |                |
|----------------------------------|-------------|----------------|---------------------------------|-------------|----------------|
|                                  | Correlation | <i>p-value</i> |                                 | Correlation | <i>p-value</i> |
| Temperature                      | -0.283      | 0.020*         | TN                              | -0.055      | 0.668          |
| pH                               | 0.370       | 0.002**        | NH <sub>4</sub> <sup>+</sup> -N | 0.050       | 0.697          |
| DO                               | 0.241       | 0.049*         | NO <sub>2</sub> <sup>-</sup> -N | 0.231       | 0.067          |
| Conductivity                     | -0.395      | 0.001***       | NO <sub>3</sub> <sup>-</sup> -N | -0.030      | 0.814          |
| Chl-a                            | -0.401      | 0.001***       | TP                              | -0.010      | 0.938          |
| TN                               | -0.320      | 0.008**        | IP                              | -0.074      | 0.560          |
| NO <sub>3</sub> <sup>-</sup> -N  | -0.353      | 0.004**        |                                 |             |                |
| NH <sub>4</sub> <sup>+</sup> -N  | -0.318      | 0.012*         |                                 |             |                |
| PO <sub>4</sub> <sup>3-</sup> -P | -0.246      | 0.082          |                                 |             |                |
| TP                               | -0.374      | 0.002**        |                                 |             |                |

Table S15. Topological properties of co-occurrence network for bacterioplankton and sedimentary bacteria.

| Habitat  | Season | Nodes | Edges | Average Degree | Average transitivity | Average Clustering coefficient | Average path length | Diameter | Modularity | Graph density | Positive Relationship (%) |
|----------|--------|-------|-------|----------------|----------------------|--------------------------------|---------------------|----------|------------|---------------|---------------------------|
| Water    | Spring | 130   | 297   | 4.569          | 0.468                | 0.510                          | 1.462               | 6.179    | 0.111      | 0.035         | 73.401                    |
|          | Summer | 307   | 1088  | 7.088          | 0.364                | 0.375                          | 1.873               | 9.808    | 0.006      | 0.023         | 80.882                    |
|          | Autumn | 166   | 222   | 2.675          | 0.396                | 0.359                          | 3.099               | 8.701    | 0.608      | 0.016         | 90.541                    |
|          | Winter | 69    | 41    | 1.188          | 0                    | 0                              | 1.112               | 3.332    | 0.947      | 0.017         | 87.805                    |
| Sediment | Spring | 529   | 7338  | 27.743         | 0.486                | 0.461                          | 0.259               | 2.933    | 0.000      | 0.053         | 64.282                    |
|          | Summer | 509   | 3624  | 14.240         | 0.505                | 0.410                          | 0.597               | 5.939    | 0.009      | 0.028         | 66.253                    |
|          | Autumn | 457   | 3500  | 15.317         | 0.468                | 0.411                          | 0.258               | 3.075    | 0.002      | 0.034         | 59.171                    |
|          | Winter | 557   | 12616 | 45.300         | 0.717                | 0.543                          | 0.699               | 5.297    | 0.001      | 0.081         | 63.079                    |

Table S16. Topological properties of the planktonic and sedimentary bacterial networks.

| Habitat  | Season | Scenario | Nodes | Edges | Average Degree | Average transitivity | Average Clustering coefficient | Average path length | Diameter | Modularity | Graph density | Positive Relationship (%) |
|----------|--------|----------|-------|-------|----------------|----------------------|--------------------------------|---------------------|----------|------------|---------------|---------------------------|
| Water    | Spring | C        | 38    | 25    | 1.316          | 1                    | 1                              | 0.48                | 1        | 0.922      | 0.036         | 60                        |
|          | Spring | T        | 24    | 15    | 1.25           | 1                    | 1                              | 0.733               | 1        | 0.88       | 0.054         | 80                        |
|          | Spring | H        | 43    | 29    | 1.349          | 1                    | 1                              | 0.517               | 1        | 0.93       | 0.032         | 62.069                    |
|          | Summer | C        | 98    | 136   | 2.776          | 0.958                | 0.884                          | 0.759               | 2.957    | 0.911      | 0.029         | 85.294                    |
|          | Summer | T        | 77    | 107   | 2.779          | 0.79                 | 0.839                          | 0.771               | 3.941    | 0.76       | 0.037         | 79.439                    |
|          | Summer | H        | 28    | 14    | 1              | NA                   | NA                             | 0.857               | 1        | 0.929      | 0.037         | 85.714                    |
|          | Autumn | C        | 45    | 24    | 1.067          | 1                    | 1                              | 0.917               | 1        | 0.948      | 0.024         | 91.667                    |
|          | Autumn | T        | 33    | 24    | 1.455          | 1                    | 1                              | 1                   | 1        | 0.802      | 0.045         | 100                       |
|          | Autumn | H        | 107   | 119   | 2.224          | 0.807                | 0.874                          | 1.039               | 2.957    | 0.868      | 0.021         | 78.992                    |
|          | Winter | C        | 23    | 13    | 1.13           | 1                    | 1                              | 0.692               | 1        | 0.888      | 0.051         | 69.231                    |
|          | Winter | T        | 71    | 76    | 2.141          | 0.9                  | 0.894                          | 0.892               | 2.956    | 0.904      | 0.031         | 86.842                    |
|          | Winter | H        | 29    | 16    | 1.103          | 1                    | 1                              | 0.75                | 1        | 0.914      | 0.039         | 81.25                     |
| Sediment | Spring | C        | 133   | 181   | 2.722          | 0.909                | 0.894                          | 0.413               | 2.957    | 0.922      | 0.021         | 61.878                    |
|          | Spring | T        | 152   | 277   | 3.645          | 0.858                | 0.891                          | 0.423               | 1.971    | 0.849      | 0.024         | 63.538                    |
|          | Spring | H        | 137   | 163   | 2.38           | 0.856                | 0.796                          | 0.674               | 4.928    | 0.895      | 0.017         | 69.325                    |
|          | Summer | C        | 135   | 332   | 4.919          | 0.828                | 0.855                          | 0.394               | 2.957    | 0.797      | 0.037         | 59.337                    |
|          | Summer | T        | 127   | 280   | 4.409          | 0.764                | 0.784                          | 0.609               | 3.942    | 0.434      | 0.035         | 58.214                    |
|          | Summer | H        | 76    | 50    | 1.316          | 1                    | 1                              | 0.5                 | 1        | 0.961      | 0.018         | 58                        |
|          | Autumn | C        | 146   | 196   | 2.685          | 0.792                | 0.801                          | 0.311               | 1.971    | 0.877      | 0.019         | 50.51                     |
|          | Autumn | T        | 162   | 290   | 3.58           | 0.819                | 0.828                          | 0.796               | 2.957    | 0.854      | 0.022         | 53.793                    |
|          | Autumn | H        | 129   | 261   | 4.047          | 1                    | 1                              | 0.061               | 1        | 0.92       | 0.032         | 52.49                     |
|          | Winter | C        | 146   | 170   | 2.329          | 0.876                | 0.882                          | 0.505               | 2.957    | 0.937      | 0.016         | 74.706                    |
|          | Winter | T        | 153   | 283   | 3.699          | 0.828                | 0.801                          | 0.63                | 3.942    | 0.843      | 0.024         | 71.025                    |
|          | Winter | H        | 147   | 181   | 2.463          | 0.758                | 0.853                          | 0.498               | 1.971    | 0.927      | 0.017         | 54.144                    |



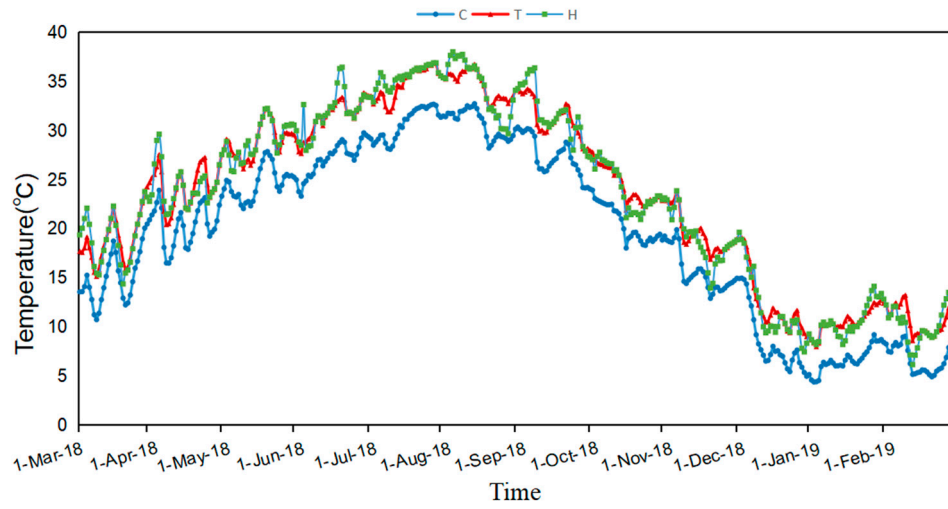

Figure S1. Temperature trend for all the treatments during the experiment. Each point on the curve represents the average temperature of the day. C, environment temperature; T, constant warming; H, heatwave.

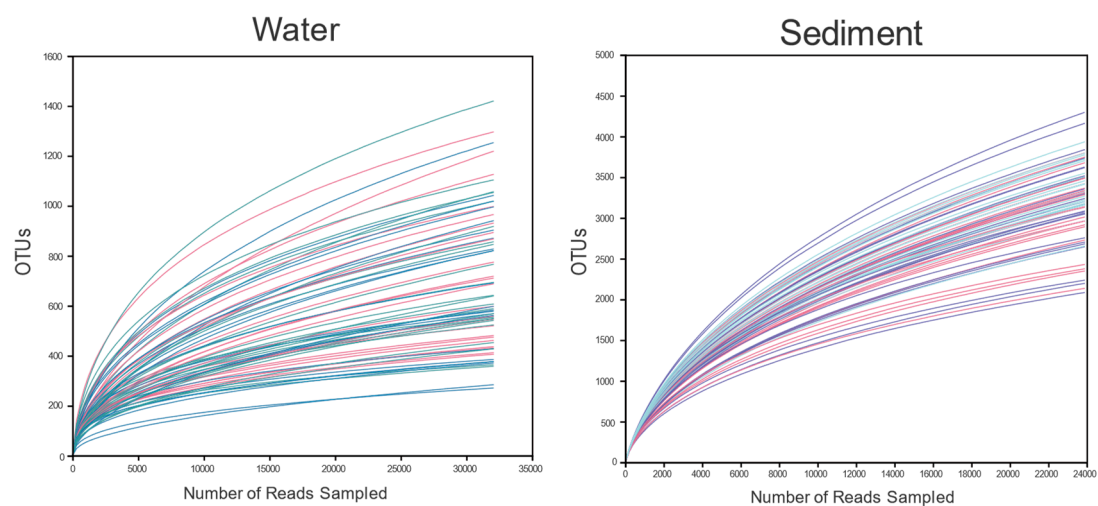

Figure S2. Rarefaction curves of water and sediments were constructed based on the number of reads sampled and the number of OTUs.

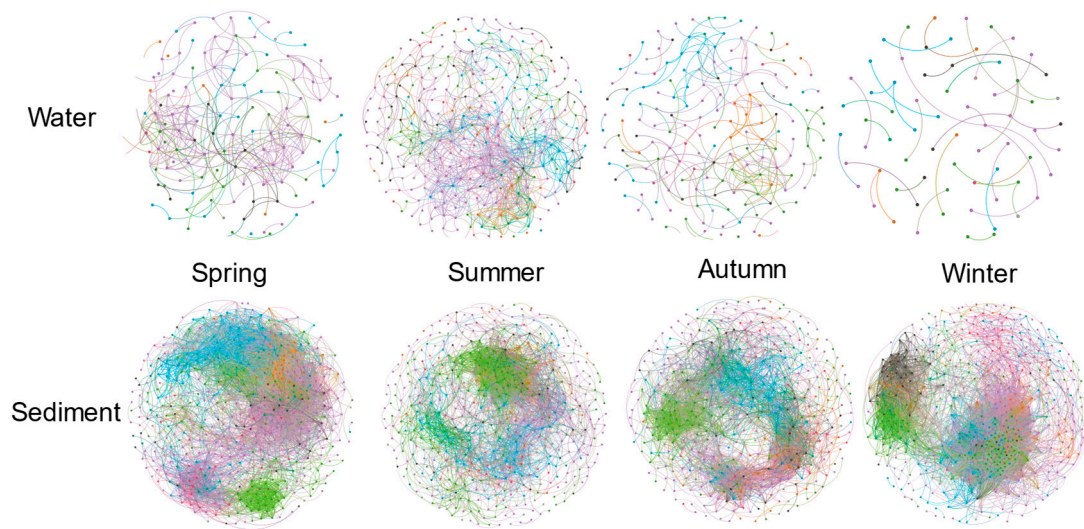

Figure S3. Co-occurrence network of bacterioplankton and sedimentary bacteria of four seasons. (The nodes represent OTUs with a total abundance greater than 0.1% in samples. Spearman correlation  $\geq 0.6$ ;  $p < 0.05$ ). Nodes colors correspond to the phylum of bacteria community.
